# Supplementary material
Source: PubMed Central journal article supplement (PMC11029619)
Supplement: 262_2013_1446_MOESM1_ESM.pdf [file 262_2013_1446_MOESM1_ESM.pdf]

| <b>Supplemental Table 1. Comparison of full sample set vs. sample set without MSI patients</b> |                             |              |                                      |              |
|------------------------------------------------------------------------------------------------|-----------------------------|--------------|--------------------------------------|--------------|
|                                                                                                | <b>All Samples (N = 15)</b> |              | <b>Non-MSI Samples Only (N = 13)</b> |              |
| <b>Norm. Entropy</b>                                                                           | <b>Mucosa</b>               | <b>Tumor</b> | <b>Mucosa</b>                        | <b>Tumor</b> |
| Mean                                                                                           | 0.884                       | 0.839        | 0.889                                | 0.840        |
| P-value*                                                                                       |                             | 0.01         |                                      | 0.006        |
| <b>Unique TCRs</b>                                                                             |                             |              |                                      |              |
| Mean                                                                                           | 935                         | 1182         | 953                                  | 1168         |
| StDev                                                                                          | 394                         | 778          | 413                                  | 815          |
| P-value**                                                                                      |                             | 0.04         |                                      | 0.07         |
| * Two-tailed Wilcoxon signed-rank test                                                         |                             |              |                                      |              |
| ** Two-tailed Filgner-Killeen test for homogeneity of variances                                |                             |              |                                      |              |
